# Supplementary material
Source: MDPI journal article supplement (https://www.mdpi.com/2311-5637/9/3/290)
Supplement: s1 [file s1]

**Table S1.** Results of the high-throughput preliminary screening of LAB-CFS against spoilage bacteria in common media.

The OD<sub>600</sub> values reported in red marked the inhibition. Bacterial cultures in which the OD<sub>600</sub> (growth) of both 24h and 48h was inhibited, according to the applied formula, were chosen for further investigations.

| PAT/LAB                        | <i>F. sanfranciscensis</i><br>UMCC<br>2990 | <i>L. plantarum</i><br>UMCC<br>2996 | <i>F. rossiae</i><br>UMCC<br>3002 | <i>P. pentosaceus</i><br>UMCC<br>3010 | <i>Lc. citreum</i><br>UMCC<br>3011 | <i>P. pentosaceus</i><br>NFICC<br>10 | <i>L. plantarum</i><br>NFICC<br>19 | <i>L. plantarum</i><br>NFICC<br>27 | <i>Lc. citreum</i><br>NFICC<br>28 | <i>P. pentosaceus</i><br>NFICC<br>58 | <i>L. plantarum</i><br>NFICC<br>72 | <i>Lc. citreum</i><br>NFICC<br>87 | <i>Lc. citreum</i><br>NFICC<br>94 | <i>P. pentosaceus</i><br>FICC<br>103 | <i>L. plantarum</i><br>NFICC<br>163 | <i>L. plantarum</i><br>NFICC<br>207 | <i>L. plantarum</i><br>NFICC<br>293 | <i>P. pentosaceus</i><br>NFICC<br>341 |
|--------------------------------|--------------------------------------------|-------------------------------------|-----------------------------------|---------------------------------------|------------------------------------|--------------------------------------|------------------------------------|------------------------------------|-----------------------------------|--------------------------------------|------------------------------------|-----------------------------------|-----------------------------------|--------------------------------------|-------------------------------------|-------------------------------------|-------------------------------------|---------------------------------------|
| <i>B. cereus</i> DSM 2301      | 0.14                                       | 0.14                                | 0.14                              | 0.13                                  | 0.15                               | 0.14                                 | 0.14                               | 0.14                               | 0.14                              | 0.14                                 | 0.14                               | 0.13                              | 0.14                              | 0.15                                 | 0.14                                | 0.11                                | 0.19                                | 0.15                                  |
| 24h                            | 0.21                                       | 0.21                                | 0.27                              | 0.22                                  | 0.27                               | 0.49                                 | 0.21                               | 0.22                               | 0.19                              | 0.50                                 | 0.22                               | 0.45                              | 0.21                              | 0.57                                 | 0.20                                | 1.05                                | 0.23                                | 0.53                                  |
| 48h                            | 0.20                                       | 0.21                                | 0.23                              | 0.19                                  | 0.24                               | 0.35                                 | 0.18                               | 0.18                               | 0.20                              | 0.43                                 | 0.24                               | 0.60                              | 0.27                              | 0.52                                 | 0.28                                | 1.11                                | 0.27                                | 0.48                                  |
| <i>B. cereus</i> DSM 4222      | 0.14                                       | 0.14                                | 0.14                              | 0.14                                  | 0.14                               | 0.14                                 | 0.14                               | 0.14                               | 0.11                              | 0.14                                 | 0.14                               | 0.14                              | 0.14                              | 0.14                                 | 0.13                                | 0.14                                | 0.15                                | 0.18                                  |
| 24h                            | 0.25                                       | 0.26                                | 0.28                              | 0.27                                  | 0.30                               | 0.50                                 | 0.25                               | 0.28                               | 0.25                              | 0.52                                 | 0.25                               | 0.38                              | 0.28                              | 0.56                                 | 0.27                                | 0.60                                | 0.32                                | 0.58                                  |
| 48h                            | 0.26                                       | 0.25                                | 0.25                              | 0.39                                  | 0.29                               | 0.24                                 | 0.26                               | 0.26                               | 0.44                              | 0.26                                 | 0.37                               | 0.52                              | 0.31                              | 0.52                                 | 0.29                                | 0.58                                | 0.33                                | 0.54                                  |
| <i>B. cereus</i> DSM 22905     | 0.14                                       | 0.14                                | 0.14                              | 0.15                                  | 0.15                               | 0.15                                 | 0.14                               | 0.17                               | 0.14                              | 0.13                                 | 0.14                               | 0.14                              | 0.14                              | 0.14                                 | 0.14                                | 0.14                                | 0.15                                | 0.19                                  |
| 24h                            | 0.27                                       | 0.36                                | 0.41                              | 0.47                                  | 0.44                               | 0.73                                 | 0.54                               | 0.51                               | 0.48                              | 0.77                                 | 0.34                               | 0.31                              | 0.27                              | 0.69                                 | 0.24                                | 0.54                                | 0.31                                | 0.68                                  |
| 48h                            | 0.30                                       | 0.35                                | 0.40                              | 0.48                                  | 0.45                               | 1.43                                 | 0.50                               | 0.52                               | 0.49                              | 0.77                                 | 0.41                               | 1.13                              | 0.37                              | 0.69                                 | 0.37                                | 0.79                                | 0.35                                | 0.68                                  |
| <i>B. cytotoxicus</i> DSM 4312 | 0.14                                       | 0.14                                | 0.15                              | 0.14                                  | 0.15                               | 0.14                                 | 0.14                               | 0.14                               | 0.14                              | 0.13                                 | 0.15                               | 0.14                              | 0.14                              | 0.14                                 | 0.14                                | 0.14                                | 0.15                                | 0.20                                  |
| 24h                            | 0.31                                       | 0.34                                | 0.30                              | 0.34                                  | 0.35                               | 0.54                                 | 0.35                               | 0.35                               | 0.34                              | 0.41                                 | 0.34                               | 0.58                              | 0.31                              | 0.53                                 | 0.32                                | 0.68                                | 0.34                                | 0.65                                  |
| 48h                            | 0.30                                       | 0.33                                | 0.32                              | 0.32                                  | 0.36                               | 0.49                                 | 0.32                               | 0.34                               | 0.32                              | 0.45                                 | 0.38                               | 1.27                              | 0.31                              | 0.50                                 | 0.32                                | 0.70                                | 0.33                                | 0.64                                  |
| <i>B. mycoides</i> NFICC503    | 0.15                                       | 0.14                                | 0.14                              | 0.14                                  | 0.15                               | 0.14                                 | 0.14                               | 0.14                               | 0.14                              | 0.14                                 | 0.14                               | 0.15                              | 0.11                              | 0.15                                 | 0.15                                | 0.15                                | 0.15                                | 0.20                                  |
| 24h                            | 0.31                                       | 0.32                                | 0.27                              | 0.31                                  | 0.35                               | 0.53                                 | 0.31                               | 0.31                               | 0.30                              | 0.50                                 | 0.31                               | 0.43                              | 0.33                              | 0.53                                 | 0.32                                | 0.61                                | 0.31                                | 0.58                                  |
| 48h                            | 0.29                                       | 0.33                                | 0.31                              | 0.30                                  | 0.34                               | 0.43                                 | 0.30                               | 0.31                               | 0.30                              | 0.48                                 | 0.36                               | 1.10                              | 0.32                              | 0.47                                 | 0.31                                | 0.60                                | 0.30                                | 0.58                                  |
| <i>B. altitudinis</i> NFICC510 | 0.17                                       | 0.13                                | 0.14                              | 0.14                                  | 0.14                               | 0.16                                 | 0.17                               | 0.16                               | 0.17                              | 0.16                                 | 0.13                               | 0.14                              | 0.13                              | 0.13                                 | 0.13                                | 0.13                                | 0.14                                | 0.20                                  |
| 24h                            | 0.32                                       | 0.31                                | 0.33                              | 0.31                                  | 0.39                               | 0.71                                 | 0.39                               | 0.38                               | 0.37                              | 0.95                                 | 0.32                               | 0.47                              | 0.21                              | 0.49                                 | 0.20                                | 0.54                                | 0.26                                | 0.50                                  |
| 48h                            | 0.34                                       | 0.36                                | 0.35                              | 0.35                                  | 0.41                               | 0.68                                 | 0.43                               | 0.42                               | 0.42                              | 1.57                                 | 0.38                               | 1.21                              | 0.28                              | 0.46                                 | 0.26                                | 0.49                                | 0.31                                | 0.50                                  |
| <i>B. mycoides</i> NFICC526    | 0.13                                       | 0.13                                | 0.14                              | 0.13                                  | 0.14                               | 0.13                                 | 0.14                               | 0.14                               | 0.14                              | 0.14                                 | 0.15                               | 0.14                              | 0.14                              | 0.14                                 | 0.17                                | 0.14                                | 0.14                                | 0.18                                  |
| 24h                            | 0.24                                       | 0.23                                | 0.26                              | 0.23                                  | 0.28                               | 0.45                                 | 0.23                               | 0.24                               | 0.22                              | 0.46                                 | 0.24                               | 0.36                              | 0.38                              | 0.51                                 | 0.35                                | 0.70                                | 0.41                                | 0.61                                  |
| 48h                            | 0.22                                       | 0.22                                | 0.23                              | 0.21                                  | 0.27                               | 0.35                                 | 0.22                               | 0.22                               | 0.20                              | 0.38                                 | 0.21                               | 0.35                              | 0.29                              | 0.43                                 | 0.30                                | 0.55                                | 0.30                                | 0.51                                  |
| <i>B. subtilis</i> NFICC528    | 0.13                                       | 0.13                                | 0.14                              | 0.13                                  | 0.14                               | 0.13                                 | 0.13                               | 0.11                               | 0.11                              | 0.13                                 | 0.11                               | 0.14                              | 0.14                              | 0.14                                 | 0.13                                | 0.13                                | 0.13                                | 0.18                                  |
| 24h                            | 0.38                                       | 0.26                                | 0.32                              | 0.35                                  | 0.41                               | 0.74                                 | 0.38                               | 0.30                               | 0.30                              | 0.70                                 | 0.38                               | 0.43                              | 0.29                              | 0.69                                 | 0.29                                | 0.78                                | 0.30                                | 0.63                                  |
| 48h                            | 0.33                                       | 0.26                                | 0.29                              | 0.31                                  | 0.36                               | 0.61                                 | 0.33                               | 0.31                               | 0.59                              | 0.35                                 | 0.57                               | 0.43                              | 0.34                              | 0.60                                 | 0.35                                | 0.66                                | 0.33                                | 0.57                                  |
| <i>B. pumilus</i> NFICC530     | 0.14                                       | 0.14                                | 0.14                              | 0.14                                  | 0.15                               | 0.14                                 | 0.13                               | 0.14                               | 0.14                              | 0.14                                 | 0.14                               | 0.14                              | 0.14                              | 0.15                                 | 0.15                                | 0.15                                | 0.14                                | 0.19                                  |
| 24h                            | 0.42                                       | 0.34                                | 0.31                              | 0.40                                  | 0.42                               | 0.62                                 | 0.44                               | 0.38                               | 0.37                              | 0.59                                 | 0.45                               | 0.44                              | 0.40                              | 0.66                                 | 0.42                                | 0.80                                | 0.36                                | 0.65                                  |
| 48h                            | 0.32                                       | 0.27                                | 0.28                              | 0.33                                  | 0.36                               | 0.53                                 | 0.37                               | 0.31                               | 0.31                              | 0.55                                 | 0.42                               | 1.22                              | 0.31                              | 0.54                                 | 0.33                                | 0.73                                | 0.30                                | 0.58                                  |
| <i>B. simplex</i> NFICC531     | 0.11                                       | 0.11                                | 0.12                              | 0.14                                  | 0.16                               | 0.15                                 | 0.15                               | 0.14                               | 0.15                              | 0.13                                 | 0.15                               | 0.15                              | 0.15                              | 0.14                                 | 0.14                                | 0.15                                | 0.14                                | 0.18                                  |
| 24h                            | 0.35                                       | 0.39                                | 0.33                              | 0.36                                  | 0.43                               | 0.61                                 | 0.36                               | 0.40                               | 0.35                              | 0.59                                 | 0.43                               | 0.95                              | 0.21                              | 0.44                                 | 0.20                                | 1.02                                | 0.24                                | 0.47                                  |
| 48h                            | 0.31                                       | 0.30                                | 0.31                              | 0.31                                  | 0.35                               | 0.52                                 | 0.31                               | 0.34                               | 0.32                              | 1.05                                 | 0.95                               | 0.97                              | 0.24                              | 0.40                                 | 0.25                                | 0.95                                | 0.27                                | 0.44                                  |
| <i>B. cereus</i> NFICC740      | 0.17                                       | 0.15                                | 0.18                              | 0.17                                  | 0.20                               | 0.19                                 | 0.15                               | 0.18                               | 0.16                              | 0.17                                 | 0.17                               | 0.19                              | 0.19                              | 0.18                                 | 0.17                                | 0.19                                | 0.17                                | 0.20                                  |
| 24h                            | 0.35                                       | 0.27                                | 0.37                              | 0.34                                  | 0.40                               | 0.54                                 | 0.35                               | 0.36                               | 0.32                              | 0.57                                 | 0.40                               | 1.07                              | 0.38                              | 0.65                                 | 0.38                                | 1.15                                | 0.36                                | 0.52                                  |

|                                       |      |      |      |      |      |      |      |      |      |      |      |      |      |      |      |      |      |      |
|---------------------------------------|------|------|------|------|------|------|------|------|------|------|------|------|------|------|------|------|------|------|
| 48h                                   | 0.31 | 0.31 | 0.35 | 0.35 | 0.37 | 0.46 | 0.30 | 0.30 | 0.29 | 0.61 | 0.88 | 1.16 | 0.37 | 0.57 | 0.38 | 1.37 | 0.36 | 0.50 |
| <i>B. cereus</i> NFICC781             | 0.18 | 0.17 | 0.19 | 0.19 | 0.17 | 0.19 | 0.14 | 0.19 | 0.15 | 0.17 | 0.14 | 0.19 | 0.13 | 0.18 | 0.19 | 0.19 | 0.18 | 0.20 |
| 24h                                   | 0.40 | 0.39 | 0.43 | 0.39 | 0.49 | 0.53 | 0.35 | 0.37 | 0.26 | 0.54 | 0.36 | 1.32 | 0.32 | 0.56 | 0.35 | 1.43 | 0.32 | 0.41 |
| 48h                                   | 0.39 | 0.40 | 0.40 | 0.39 | 0.48 | 0.52 | 0.36 | 0.36 | 0.48 | 1.15 | 1.00 | 1.31 | 0.40 | 0.58 | 0.35 | 1.31 | 0.34 | 0.45 |
| <i>B. thuringiensis</i> NFICC816      | 0.17 | 0.18 | 0.17 | 0.17 | 0.18 | 0.16 | 0.17 | 0.18 | 0.17 | 0.17 | 0.17 | 0.17 | 0.20 | 0.20 | 0.20 | 0.20 | 0.19 | 0.21 |
| 24h                                   | 0.32 | 0.41 | 0.44 | 0.28 | 0.40 | 0.39 | 0.18 | 0.20 | 0.19 | 0.41 | 0.27 | 0.68 | 0.37 | 0.50 | 0.30 | 0.42 | 0.10 | 0.13 |
| 48h                                   | 0.36 | 0.45 | 0.50 | 0.32 | 0.44 | 0.41 | 0.21 | 0.23 | 0.22 | 0.45 | 0.37 | 0.63 | 0.40 | 0.53 | 0.34 | 0.53 | 0.10 | 0.12 |
| <i>B. weihenstephanensis</i> NFICC855 | 0.22 | 0.20 | 0.20 | 0.19 | 0.21 | 0.19 | 0.22 | 0.21 | 0.18 | 0.21 | 0.23 | 0.19 | 0.22 | 0.22 | 0.23 | 0.21 | 0.22 | 0.24 |
| 24h                                   | 0.26 | 0.34 | 0.43 | 0.18 | 0.36 | 0.10 | 0.09 | 0.09 | 0.09 | 0.09 | 0.16 | 0.53 | 0.23 | 0.45 | 0.34 | 0.10 | 0.09 | 0.09 |
| 48h                                   | 0.31 | 0.35 | 0.43 | 0.21 | 0.39 | 0.10 | 0.09 | 0.09 | 0.09 | 0.10 | 0.10 | 0.20 | 0.31 | 0.43 | 0.32 | 0.14 | 0.09 | 0.09 |
| <i>B. amyloliquefaciens</i> NFICC869  | 0.18 | 0.15 | 0.19 | 0.17 | 0.18 | 0.22 | 0.16 | 0.16 | 0.16 | 0.18 | 0.18 | 0.17 | 0.16 | 0.16 | 0.17 | 0.16 | 0.16 | 0.18 |
| 24h                                   | 0.33 | 0.35 | 0.40 | 0.34 | 0.39 | 0.61 | 0.29 | 0.31 | 0.35 | 0.58 | 0.34 | 1.09 | 0.35 | 0.58 | 0.34 | 0.71 | 0.34 | 0.53 |
| 48h                                   | 0.31 | 0.38 | 0.36 | 0.33 | 0.41 | 1.00 | 0.28 | 0.30 | 0.34 | 0.76 | 0.65 | 1.11 | 0.41 | 0.60 | 0.40 | 1.16 | 0.38 | 0.59 |
| <i>B. simplex</i> NFICC906            | 0.14 | 0.15 | 0.16 | 0.14 | 0.16 | 0.15 | 0.15 | 0.14 | 0.14 | 0.14 | 0.15 | 0.14 | 0.17 | 0.17 | 0.15 | 0.15 | 0.14 | 0.16 |
| 24h                                   | 0.25 | 0.32 | 0.39 | 0.25 | 0.38 | 0.52 | 0.23 | 0.22 | 0.25 | 0.54 | 0.34 | 0.73 | 0.32 | 0.52 | 0.20 | 0.44 | 0.18 | 0.39 |
| 48h                                   | 0.32 | 0.39 | 0.36 | 0.34 | 0.43 | 0.52 | 0.29 | 0.31 | 0.33 | 0.62 | 0.76 | 0.95 | 0.36 | 0.57 | 0.29 | 0.50 | 0.28 | 0.45 |
| <i>B. amyloliquefaciens</i> NFICC1127 | 0.17 | 0.17 | 0.17 | 0.16 | 0.18 | 0.16 | 0.17 | 0.17 | 0.16 | 0.16 | 0.16 | 0.15 | 0.17 | 0.16 | 0.16 | 0.17 | 0.16 | 0.19 |
| 24h                                   | 0.27 | 0.36 | 0.36 | 0.24 | 0.37 | 0.40 | 0.18 | 0.18 | 0.18 | 0.40 | 0.27 | 0.48 | 0.33 | 0.46 | 0.21 | 0.32 | 0.09 | 0.12 |
| 48h                                   | 0.33 | 0.39 | 0.36 | 0.30 | 0.41 | 0.42 | 0.23 | 0.24 | 0.24 | 0.45 | 0.31 | 0.57 | 0.38 | 0.50 | 0.27 | 0.33 | 0.09 | 0.11 |
| <i>B. amyloliquefaciens</i> NFICC1130 | 0.17 | 0.17 | 0.18 | 0.15 | 0.17 | 0.17 | 0.17 | 0.17 | 0.17 | 0.17 | 0.17 | 0.17 | 0.18 | 0.18 | 0.18 | 0.17 | 0.18 | 0.19 |
| 24h                                   | 0.28 | 0.36 | 0.37 | 0.20 | 0.34 | 0.18 | 0.09 | 0.08 | 0.08 | 0.08 | 0.12 | 0.29 | 0.34 | 0.43 | 0.18 | 0.09 | 0.08 | 0.09 |
| 48h                                   | 0.32 | 0.42 | 0.37 | 0.20 | 0.39 | 0.12 | 0.09 | 0.08 | 0.08 | 0.09 | 0.09 | 0.11 | 0.34 | 0.40 | 0.15 | 0.09 | 0.09 | 0.09 |
| <i>B. subtilis</i> NFICC1525          | 0.15 | 0.14 | 0.15 | 0.15 | 0.17 | 0.11 | 0.15 | 0.15 | 0.17 | 0.15 | 0.14 | 0.15 | 0.15 | 0.16 | 0.23 | 0.17 | 0.14 | 0.19 |
| 24h                                   | 0.29 | 0.32 | 0.35 | 0.29 | 0.38 | 0.32 | 0.31 | 0.31 | 0.28 | 0.60 | 0.31 | 0.95 | 0.26 | 0.64 | 0.30 | 1.12 | 0.25 | 0.58 |
| 48h                                   | 0.32 | 0.32 | 0.38 | 0.28 | 0.41 | 0.47 | 0.30 | 0.32 | 0.32 | 1.13 | 0.85 | 1.04 | 0.31 | 0.64 | 0.35 | 1.24 | 0.32 | 0.64 |
| <i>B. subtilis</i> NFICC1534          | 0.15 | 0.14 | 0.15 | 0.15 | 0.14 | 0.15 | 0.14 | 0.15 | 0.15 | 0.15 | 0.15 | 0.16 | 0.15 | 0.16 | 0.13 | 0.15 | 0.15 | 0.19 |
| 24h                                   | 0.25 | 0.26 | 0.33 | 0.24 | 0.33 | 0.55 | 0.26 | 0.26 | 0.21 | 0.60 | 0.27 | 0.35 | 0.17 | 0.47 | 0.20 | 0.39 | 0.19 | 0.46 |
| 48h                                   | 0.31 | 0.34 | 0.33 | 0.30 | 0.34 | 0.55 | 0.33 | 0.35 | 0.31 | 0.86 | 0.83 | 1.01 | 0.28 | 0.47 | 0.30 | 0.47 | 0.33 | 0.46 |
| <i>B. licheniformis</i> NFICC1549     | 0.14 | 0.17 | 0.17 | 0.19 | 0.17 | 0.17 | 0.14 | 0.17 | 0.16 | 0.16 | 0.19 | 0.19 | 0.17 | 0.17 | 0.17 | 0.16 | 0.18 | 0.18 |
| 24h                                   | 0.27 | 0.32 | 0.33 | 0.27 | 0.34 | 0.43 | 0.22 | 0.25 | 0.24 | 0.45 | 0.27 | 0.82 | 0.21 | 0.26 | 0.14 | 0.29 | 0.12 | 0.13 |
| 48h                                   | 0.23 | 0.31 | 0.30 | 0.21 | 0.32 | 0.24 | 0.10 | 0.16 | 0.15 | 0.28 | 0.20 | 1.03 | 0.17 | 0.13 | 0.11 | 0.24 | 0.09 | 0.11 |
| <i>L. fusiformis</i> NFICC119         | 0.14 | 0.14 | 0.14 | 0.14 | 0.15 | 0.14 | 0.14 | 0.14 | 0.14 | 0.14 | 0.14 | 0.14 | 0.14 | 0.14 | 0.14 | 0.14 | 0.14 | 0.17 |
| 24h                                   | 0.40 | 0.40 | 0.49 | 0.37 | 0.45 | 0.65 | 0.31 | 0.38 | 0.31 | 0.66 | 0.34 | 0.70 | 0.37 | 0.86 | 0.49 | 0.92 | 0.45 | 0.64 |
| 48h                                   | 0.42 | 0.38 | 0.53 | 0.40 | 0.49 | 0.90 | 0.30 | 0.46 | 0.30 | 0.92 | 0.38 | 0.84 | 0.43 | 1.08 | 0.61 | 1.12 | 0.62 | 1.04 |
| <i>L. sphaericus</i> NFICC529         | 0.14 | 0.13 | 0.14 | 0.14 | 0.15 | 0.15 | 0.14 | 0.14 | 0.14 | 0.14 | 0.14 | 0.14 | 0.15 | 0.15 | 0.14 | 0.14 | 0.13 | 0.16 |
| 24h                                   | 0.39 | 0.39 | 0.39 | 0.42 | 0.43 | 0.63 | 0.37 | 0.37 | 0.60 | 0.39 | 0.77 | 0.77 | 0.36 | 0.44 | 0.37 | 0.92 | 0.41 | 0.54 |

|                                   |      |      |      |      |      |      |      |      |      |      |      |      |      |      |      |      |      |       |
|-----------------------------------|------|------|------|------|------|------|------|------|------|------|------|------|------|------|------|------|------|-------|
| 48h                               | 0.43 | 0.47 | 0.33 | 0.43 | 0.48 | 0.99 | 0.42 | 0.43 | 0.44 | 0.99 | 0.51 | 0.75 | 0.40 | 0.71 | 0.43 | 1.15 | 0.51 | 0.57  |
| <i>L. fusiformis</i> NFICC532     | 0.14 | 0.14 | 0.14 | 0.13 | 0.15 | 0.14 | 0.14 | 0.14 | 0.14 | 0.13 | 0.13 | 0.14 | 0.14 | 0.14 | 0.14 | 0.15 | 0.14 | 0.16  |
| 24h                               | 0.36 | 0.35 | 0.38 | 0.38 | 0.42 | 0.52 | 0.39 | 0.35 | 0.35 | 0.48 | 0.41 | 0.74 | 0.35 | 0.50 | 0.38 | 0.67 | 0.37 | 0.53  |
| 48h                               | 0.43 | 0.43 | 0.35 | 0.44 | 0.50 | 0.73 | 0.45 | 0.41 | 0.42 | 0.91 | 0.48 | 0.76 | 0.44 | 0.69 | 0.55 | 0.95 | 0.50 | 0.55  |
| <i>L. sphaericus</i> NFICC871     | 0.14 | 0.14 | 0.14 | 0.14 | 0.15 | 0.14 | 0.13 | 0.13 | 0.13 | 0.14 | 0.13 | 0.14 | 0.14 | 0.15 | 0.14 | 0.14 | 0.13 | 0.16  |
| 24h                               | 0.39 | 0.38 | 0.41 | 0.42 | 0.44 | 0.57 | 0.39 | 0.36 | 0.35 | 0.68 | 0.34 | 0.78 | 0.35 | 0.64 | 0.32 | 0.76 | 0.38 | 0.49  |
| 48h                               | 0.47 | 0.37 | 0.34 | 0.47 | 0.50 | 0.90 | 0.43 | 0.44 | 0.44 | 1.03 | 0.41 | 0.96 | 0.26 | 0.85 | 0.28 | 1.01 | 0.38 | 0.41  |
| <i>L. boronitolerans</i> NFICC879 | 0.11 | 0.12 | 0.12 | 0.12 | 0.13 | 0.12 | 0.11 | 0.12 | 0.12 | 0.12 | 0.12 | 0.12 | 0.11 | 0.12 | 0.11 | 0.12 | 0.11 | 0.14  |
| 24h                               | 0.22 | 0.22 | 0.24 | 0.23 | 0.25 | 0.39 | 0.21 | 0.20 | 0.18 | 0.35 | 0.19 | 0.38 | 0.24 | 0.41 | 0.26 | 0.70 | 0.26 | 0.447 |
| 48h                               | 0.09 | 0.19 | 0.19 | 0.09 | 0.15 | 0.09 | 0.08 | 0.09 | 0.11 | 0.27 | 0.19 | 0.42 | 0.22 | 0.34 | 0.20 | 0.53 | 0.24 | 0.33  |
| <i>L. fusiformis</i> NFICC882     | 0.13 | 0.14 | 0.14 | 0.14 | 0.15 | 0.15 | 0.14 | 0.13 | 0.13 | 0.14 | 0.14 | 0.15 | 0.15 | 0.15 | 0.14 | 0.15 | 0.14 | 0.17  |
| 24h                               | 0.39 | 0.32 | 0.35 | 0.37 | 0.42 | 0.58 | 0.33 | 0.35 | 0.38 | 0.61 | 0.35 | 0.50 | 0.35 | 0.56 | 0.30 | 0.67 | 0.35 | 0.57  |
| 48h                               | 0.33 | 0.34 | 0.33 | 0.32 | 0.41 | 0.45 | 0.32 | 0.30 | 0.40 | 0.56 | 0.35 | 0.55 | 0.45 | 0.54 | 0.36 | 0.60 | 0.46 | 0.51  |
| <i>L. boronitolerans</i> NFICC889 | 0.14 | 0.13 | 0.15 | 0.14 | 0.13 | 0.14 | 0.13 | 0.14 | 0.13 | 0.13 | 0.14 | 0.15 | 0.13 | 0.14 | 0.14 | 0.14 | 0.13 | 0.17  |
| 24h                               | 0.73 | 0.32 | 0.33 | 0.34 | 0.31 | 1.11 | 0.35 | 0.34 | 0.35 | 0.74 | 0.33 | 1.12 | 0.38 | 0.33 | 0.30 | 1.24 | 0.38 | 0.59  |
| 48h                               | 1.23 | 0.32 | 0.42 | 0.35 | 0.34 | 1.27 | 0.34 | 0.35 | 0.36 | 1.22 | 0.35 | 1.05 | 0.42 | 0.36 | 0.34 | 1.27 | 0.46 | 0.65  |
| <i>P. polymyxa</i> NFICC432       | 0.15 | 0.15 | 0.19 | 0.15 | 0.15 | 0.15 | 0.15 | 0.19 | 0.15 | 0.18 | 0.14 | 0.19 | 0.20 | 0.18 | 0.19 | 0.15 | 0.15 | 0.17  |
| 24h                               | 0.29 | 0.25 | 0.22 | 0.25 | 0.26 | 0.26 | 0.27 | 0.26 | 0.26 | 0.40 | 0.25 | 0.20 | 0.21 | 0.19 | 0.20 | 0.58 | 0.20 | 0.38  |
| 48h                               | 0.60 | 0.29 | 0.36 | 0.30 | 0.23 | 0.50 | 0.29 | 0.29 | 0.30 | 0.72 | 0.33 | 0.24 | 0.27 | 0.21 | 0.20 | 0.63 | 0.22 | 0.40  |

**Table S2.** Results of the dual-plate agar high-throughput screening. Complete inhibition of the spoilage bacteria is scored with 3, strong inhibition with 2, partial inhibition with 1, and no inhibition with 0.

[illegible]

**Table S3.** Results of the complete API test profile after 48 hours of incubation at 30 °C

| <b>48 Hours</b>      | <i>F. sanfranciscensis</i> | <i>L. plantarum</i> | <i>F. rossiae</i> | <i>P. pentosaceus</i> | <i>Lc. citreum</i> | <i>P. pentosaceus</i> | <i>L. plantarum</i> | <i>L. plantarum</i> | <i>Lc. citreum</i> | <i>L. plantarum</i> | <i>L. plantarum</i> | <i>Lc. citreum</i> | <i>Lc. citreum</i> | <i>P. pentosaceus</i> | <i>P. pentosaceus</i> | <i>L. plantarum</i> | <i>L. plantarum</i> | <i>P. pentosaceus</i> |
|----------------------|----------------------------|---------------------|-------------------|-----------------------|--------------------|-----------------------|---------------------|---------------------|--------------------|---------------------|---------------------|--------------------|--------------------|-----------------------|-----------------------|---------------------|---------------------|-----------------------|
| <b>30°C</b>          | UMCC 2990                  | UMCC 2996           | UMCC 3002         | UMCC 3010             | UMCC 3011          | NFICC 10              | NFICC 19            | NFICC 27            | NFICC 28           | NFICC 58            | NFICC 72            | NFICC 87           | NFICC 94           | NFICC 103             | NFICC 163             | NFICC 207           | NFICC 293           | NFICC 341             |
| Control (negative)   | -                          | -                   | -                 | -                     | -                  | -                     | -                   | -                   | -                  | -                   | -                   | -                  | -                  | -                     | -                     | -                   | -                   | -                     |
| Glycerol             | -                          | -                   | -                 | -                     | -                  | +/-                   | -                   | -                   | +/-                | -                   | -                   | -                  | -                  | +/-                   | -                     | -                   | -                   | -                     |
| Erythritol           | -                          | -                   | -                 | -                     | -                  | -                     | -                   | -                   | -                  | -                   | -                   | -                  | -                  | -                     | -                     | -                   | -                   | -                     |
| D(-)-Arabinose       | -                          | -                   | -                 | -                     | -                  | -                     | -                   | -                   | -                  | -                   | -                   | -                  | -                  | -                     | -                     | -                   | -                   | -                     |
| L(+)-Arabinose       | +                          | +                   | +                 | +                     | +                  | +                     | -                   | -                   | +                  | +                   | -                   | +                  | +                  | +                     | -                     | +                   | +                   | -                     |
| Ribose               | +                          | +                   | +                 | +                     | +                  | +                     | +                   | +                   | +                  | +                   | +                   | -                  | -                  | +                     | +                     | +                   | +                   | +                     |
| D(+)-Xylose          | -                          | -                   | +                 | -                     | +                  | -                     | -                   | -                   | +                  | +                   | -                   | +                  | +                  | -                     | +/-                   | +                   | -                   | +/-                   |
| L(-)-Xylose          | -                          | -                   | -                 | -                     | -                  | -                     | -                   | -                   | -                  | -                   | -                   | -                  | -                  | -                     | -                     | -                   | -                   | -                     |
| Adonitol             | -                          | -                   | -                 | -                     | -                  | -                     | -                   | -                   | -                  | -                   | -                   | -                  | -                  | -                     | -                     | -                   | -                   | -                     |
| Beta-Methyl xyloside | -                          | -                   | -                 | -                     | -                  | +                     | -                   | -                   | -                  | -                   | -                   | -                  | -                  | -                     | -                     | -                   | -                   | -                     |
| Galactose            | +                          | +                   | +/-               | +                     | +/-                | +                     | +                   | +                   | +                  | +                   | +                   | -                  | -                  | +                     | +                     | +                   | +                   | +                     |
| D(+)-Glucose         | +                          | +                   | +                 | +                     | +                  | +                     | +                   | +                   | +                  | +                   | +                   | +                  | +                  | +                     | +                     | +                   | +                   | +                     |
| D(-)-Fructose        | +                          | +                   | +/-               | +                     | +/-                | +                     | +                   | +                   | +                  | +                   | +                   | +                  | +                  | +                     | +                     | +                   | +                   | +                     |
| D(+)-Mannose         | +                          | +                   | +/-               | +                     | +/-                | +                     | +                   | +                   | +                  | +                   | +                   | +                  | +                  | +                     | +                     | +                   | +                   | +                     |
| L(-)-Sorbitol        | -                          | -                   | -                 | -                     | -                  | -                     | -                   | -                   | -                  | -                   | -                   | -                  | -                  | -                     | -                     | -                   | -                   | -                     |
| Rhamnose             | +/-                        | -                   | -                 | +/-                   | -                  | +/-                   | -                   | -                   | +/-                | -                   | -                   | -                  | -                  | +/-                   | -                     | -                   | +/-                 | -                     |
| Dulcitol             | -                          | -                   | -                 | -                     | -                  | -                     | -                   | -                   | -                  | -                   | -                   | -                  | -                  | -                     | -                     | -                   | -                   | -                     |
| meso-Inositol        | -                          | -                   | -                 | -                     | -                  | -                     | -                   | -                   | -                  | -                   | -                   | -                  | -                  | -                     | -                     | -                   | -                   | -                     |
| Mannitol             | -                          | +                   | -                 | -                     | +/-                | +                     | +                   | +                   | +                  | +                   | +                   | +/-                | +/-                | +                     | +                     | +                   | +                   | +                     |

|                         |     |     |     |   |     |     |   |   |     |   |   |     |   |     |   |   |     |   |
|-------------------------|-----|-----|-----|---|-----|-----|---|---|-----|---|---|-----|---|-----|---|---|-----|---|
| Sorbitol                | -   | +   | -   | - | -   | +   | + | + | +   | + | + | -   | - | +   | + | + | +   | + |
| alfa-Methyl-p-mannoside | -   | +   | -   | - | -   | -   | - | - | -   | - | - | -   | - | -   | - | - | -   | - |
| alfa-Methyl-D-glucoside | -   | -   | -   | - | -   | +/- | - | - | +/- | - | - | +   | + | -   | - | - | -   | - |
| N-acetyl-glucosamine    | +   | +   | +/- | + | +/- | +   | + | + | +   | + | + | +   | + | +   | + | + | +   | + |
| Amygdalin               | +   | +   | -   | + | -   | +   | + | + | +   | + | + | -   | - | +   | + | + | +   | + |
| Arbutine                | +   | +   | -   | + | -   | +   | + | + | +   | + | + | -   | - | +   | + | + | +   | + |
| Esculine                | +   | +   | +   | + | +   | +   | + | + | +   | + | + | +   | + | +   | + | + | +   | + |
| Salicine                | +   | +   | -   | + | -   | +   | + | + | +   | + | + | +   | + | +   | + | + | +   | + |
| D(+)-cellobiose         | +   | +   | -   | + | -   | +   | + | + | +   | + | + | +   | + | +   | + | + | +   | + |
| Maltose                 | +   | +   | +   | + | +   | +   | + | + | +   | + | + | +   | + | +   | + | + | +   | + |
| Lactose                 | -   | +   | -   | - | -   | +   | + | + | +   | + | + | -   | - | +   | + | + | +   | + |
| D(+)-Melibiose          | -   | +   | +/- | - | -   | +   | + | + | +   | + | + | -   | - | +   | + | + | +   | + |
| Saccharose              | -   | +   | -   | - | -   | +   | + | + | +   | + | + | +   | + | +   | + | + | +   | + |
| D(-)-Trehalose          | +   | +   | -   | + | -   | +   | + | + | +   | + | + | +   | + | +   | + | + | +   | + |
| Inulin                  | -   | -   | -   | - | -   | -   | - | - | -   | - | - | -   | - | -   | - | - | -   | - |
| Melezitose              | -   | +   | -   | - | -   | +   | + | + | +   | + | + | -   | - | +   | + | + | +   | + |
| D(+)-Raffinose          | -   | +   | -   | - | -   | +   | + | + | +   | + | + | -   | - | +/- | + | + | +   | + |
| Starch                  | -   | -   | -   | - | -   | -   | - | - | -   | - | - | -   | - | -   | - | - | -   | - |
| Glycogene               | -   | +/- | -   | - | -   | -   | - | - | -   | - | - | -   | - | -   | - | - | -   | - |
| Xylitol                 | -   | -   | -   | - | -   | -   | - | - | -   | - | - | -   | - | -   | - | - | -   | - |
| Beta-Gentiobiose        | +/- | +   | -   | + | -   | +   | + | + | +   | + | + | +/- | + | +   | + | + | +/- | + |

|                      |   |     |     |     |     |     |   |     |     |     |   |     |     |     |     |   |     |     |
|----------------------|---|-----|-----|-----|-----|-----|---|-----|-----|-----|---|-----|-----|-----|-----|---|-----|-----|
| D-Turanose           | - | +   | -   | -   | -   | +   | - | -   | +   | +   | - | +   | +   | -   | -   | + | +   | -   |
| D-Lyxose             | - | -   | +   | -   | +   | +   | - | -   | +/- | +   | - | -   | -   | -   | -   | - | -   | -   |
| D-Tagatose           | + | -   | -   | +   | -   | -   | - | -   | +   | +   | - | -   | -   | +   | -   | - | -   | -   |
| D-Fucose             | - | -   | -   | -   | -   | -   | - | -   | -   | -   | - | -   | -   | -   | -   | - | -   | -   |
| L-Fucose             | - | -   | -   | -   | -   | -   | - | -   | -   | -   | - | -   | -   | -   | -   | - | -   | -   |
| D-Arabitol           | - | +/- | -   | -   | -   | +/- | + | +/- | +/- | +/- | + | -   | -   | +   | +/- | - | +/- | +/- |
| L-Arabitol           | - | -   | -   | -   | -   | -   | - | -   | -   | -   | - | -   | -   | -   | -   | - | -   | -   |
| Gluconate            | - | +/- | +/- | -   | +/- | +   | + | +   | +   | +/- | + | +/- | +   | +   | +   | + | +/- | +   |
| +ceto-<br>gluconate  | - | -   | -   | +/- | -   | -   | - | -   | +/- | -   | - | +/- | +/- | +   | -   | - | -   | -   |
| 5-ceto-<br>gluconate | - | -   | -   | -   | -   | +/- | - | -   | +/- | +/- | - | -   | -   | +/- | -   | - | -   | -   |

*Lactiplantibacillus plantarum* UMCC2996

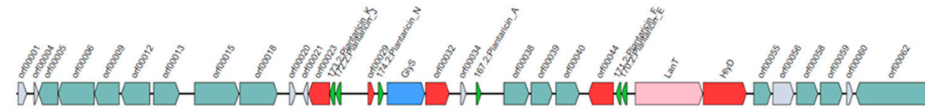

*Lactiplantibacillus plantarum* NFICC19

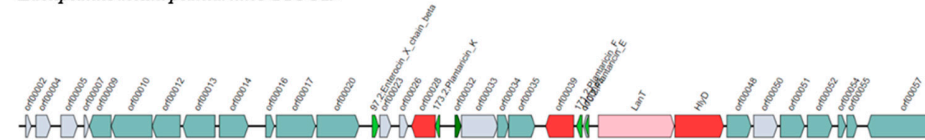

*Lactiplantibacillus plantarum* NFICC72

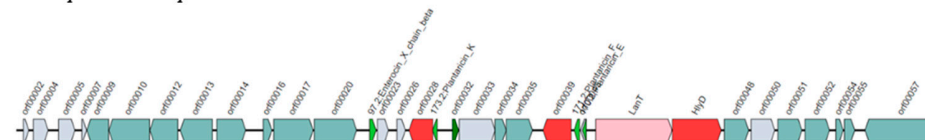

*Lactiplantibacillus plantarum* NFICC163

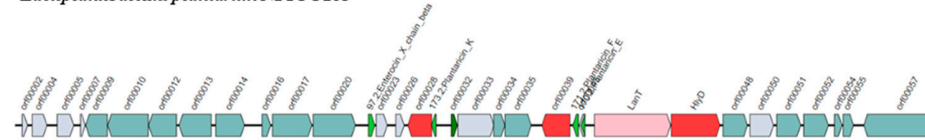

*Lactiplantibacillus plantarum* NFICC293

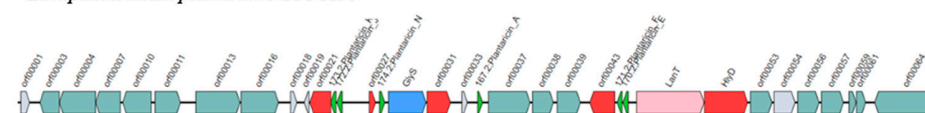

*Pediococcus pentosaceus* NFICC10

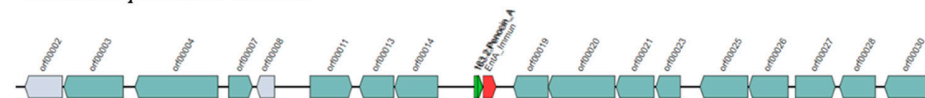

No function determined
  Blast hit with UniRef90
  Core Peptide
  Modification
  Immunity / Transport
  Transport & Leader cleavage

**Figure S1.** Gene encoding for bacteriocins detected in the genome of the best candidate strains
